# Supplementary material for: Use of Pulse Pressure Variation as Predictor of Fluid Responsiveness in Patients Ventilated With Low Tidal Volume: A Systematic Review and Meta-Analysis
Source: PubMed Central journal article supplement — Clin Med Insights Circ Respir Pulm Med. 2020 Jan 24;14:1179548420901518. doi: 10.1177/1179548420901518 (PMC6984427; doi:10.1177/1179548420901518), 2020-01-24
Supplement: Table_2_additional.pdf [file Table_2_additional.pdf]

**Table 2 additional. Subgroup analysis and Meta-regression of pulse pressure variation for prediction of fluid responsiveness in patients with tidal volume  $\leq 8$  ml  $\text{kg}^{-1}$  from included studies.**

| Subgroup                                                             | Number of studies | Odds Ratio (95% IC) | P Value | I <sup>2</sup> (%) |
|----------------------------------------------------------------------|-------------------|---------------------|---------|--------------------|
| <b>Compliance &lt; 30 ml <math>\text{cm H}_2\text{O}^{-1}</math></b> |                   |                     |         |                    |
| No                                                                   | 11                | 13.14(6.48-26.65)   | 0.058   | 59.4               |
| Yes                                                                  | 8                 | 4.55(1.96-10.54)    |         | 51.0               |
| <b>Setting</b>                                                       |                   |                     |         |                    |
| Surgical                                                             | 7                 | 9.59(3.89-23.62)    | 0.76    | 63.5               |
| Critical Care                                                        | 12                | 8.05(3.84-16.84)    |         | 59.1               |
| <b>Variable measured to determine Fluid responsiveness</b>           |                   |                     |         |                    |
| CI                                                                   | 9                 | 7.21(2.99-17.36)    | 0.55    | 69.8               |
| CO                                                                   | 3                 | 19.34(5.20-71.90)   |         | 32.0               |
| SV                                                                   | 1                 | 14.00(1.07-18.45)   |         | --                 |
| SVI                                                                  | 6                 | 6.50(2.58-16.39)    |         | 26.4               |
| <b>Method for indices</b>                                            |                   |                     |         |                    |
| LiDCO                                                                | 1                 | 14.00(0.91-214.35)  | 0.60    |                    |
| PAC                                                                  | 7                 | 15.61(5.48-44.44)   |         | 72.7               |
| PAC o PiCCO                                                          | 2                 | 17.84(2.83-112.51)  |         | 0                  |
| PiCCO                                                                | 5                 | 4.90(1.57-15.25)    |         | 60.5               |
| PiCCO2                                                               | 2                 | 6.41(1.01-40.59)    |         | 0                  |
| ProAQT                                                               | 2                 | 4.36(0.82-23.16)    |         | 50.5               |
| <b>Type of fluid</b>                                                 |                   |                     |         |                    |
| CR                                                                   | 8                 | 8.25(3.36-20.23)    | 0.90    | 65.6               |
| CR Or Colloid                                                        | 3                 | 6.65(1.41-31.37)    |         | 72.2               |
| Colloid                                                              | 8                 | 9.87(4.15-23.51)    |         | 51.6               |
| <b>Hemodynamic endpoint</b>                                          |                   |                     |         |                    |
| $\geq 15\%$                                                          | 15                | 9.55(4.91-18.54)    | 0.55    | 49.0               |
| $\geq 10\%$                                                          | 4                 | 6.51(2.17-19.51)    |         | 61.8               |
| <b>Outliers</b>                                                      |                   |                     |         |                    |
| Yes                                                                  | 2                 | 184.43(28.04-10.39) | <0.01   | 33.5               |
| No                                                                   | 17                | 6.51(4.07-10.39)    |         | 40.6               |
| <b>Tidal Volume</b>                                                  |                   |                     |         |                    |
| Tidal volume 7-8 ml. $\text{kg}^{-1}$                                | 7                 | 12.24(5.06-29.61)   | 0.30    | 40.2               |
| Tidal volume < 7 ml. $\text{kg}^{-1}$                                | 12                | 6.78(3.39-13.55)    |         | 62.6               |

Values are expressed as pooled value (95% confidence interval). CI, cardiac index; CO, cardiac output; CR, crystalloid; PAC, pulmonary artery catheter; SV, stroke volume; SVI, stroke volume index.
